# Supplementary material
Source: ML conference proceedings conference paper supplement (https://openreview.net/forum?id=8Xn3D9OtqI)
Supplement: supplementary_material [file attachment]

---

# Mitigating the Effect of Incidental Correlations on Part-based Learning (Supplementary Material)

---

Anonymous Author(s)

Affiliation

Address

email

## 1 Supplementary Material

|    |                                                                                     |          |
|----|-------------------------------------------------------------------------------------|----------|
| 2  | <b>1 Appendix</b>                                                                   | <b>1</b> |
| 3  | 1.1 Why the term "incidental correlations" for image background? . . . . .          | 1        |
| 4  | 1.2 Training and inference details for pertaining and fine-tuning DPViT . . . . .   | 1        |
| 5  | 1.3 Details regarding the multi-head attention modules . . . . .                    | 2        |
| 6  | 1.4 Details regarding the power iterative method to compute spectral norm . . . . . | 2        |
| 7  | 1.5 Comparing ViT-S [2] and Concept Transformer (CT) [5] on ImageNet-9 . . . . .    | 3        |
| 8  | 1.6 Ablation study with different values of $K$ and $n_f$ on MiniImageNet . . . . . | 3        |
| 9  | 1.7 Computational complexity of DPViT . . . . .                                     | 4        |
| 10 | 1.8 Stage-1 pertaining comparison with SMKD [4] . . . . .                           | 4        |
| 11 | 1.9 Studying complementary properties of MSA and MCA . . . . .                      | 4        |
| 12 | 1.10 Visualization foreground parts . . . . .                                       | 5        |
| 13 | 1.11 Qualitative comparison of extracted patches with ConstNet [7] . . . . .        | 5        |

## 14 1 Appendix

### 15 1.1 Why the term "incidental correlations" for image background?

16 The concept of "incidental correlations" is derived from the notion of incidental endogeneity [3],  
17 which describes unintentional but genuine correlations between variables. In the context of our study,  
18 image backgrounds are not considered spurious because they offer contextual information that aids  
19 in decision-making. Therefore, the relationship between image backgrounds and classification is  
20 not anti-causal, as would be true if the backgrounds were spurious. We argue that the imbalance of  
21 specific image backgrounds in the training data is the primary factor contributing to the introduction  
22 of incidental correlations.

### 23 1.2 Training and inference details for pertaining and fine-tuning DPViT

24 **Training Details.** Our approach involves pre-training the Vision Transformer backbone and projection  
25 head using the same method described in the iBOT paper [8]. We mostly keep the hyper-parameter  
26 settings unchanged without tuning. By default, we use the ViT-Small architecture, which consists  
27 of 21 million parameters. The patch size is set to 16 as our default configuration. The student and  
28 teacher networks have a shared projection head for the [cls] token output. The projection heads  
29 for both networks have an output dimension of 8192. We adopt a linear warm-up strategy for the  
30 learning rate over 10 epochs, starting from a base value of  $5e-4$ , and then decaying it to  $1e-5$  using a  
31 cosine schedule. Similarly, the weight decay is decayed using a cosine schedule from 0.04 to 0.4. We  
32 employ a multi-crop strategy to improve performance with 2 global crops ( $224 \times 224$ ) and 10 local

33 crops (96×96). The scale ranges for global and local crops are (0.4, 1.0) and (0.05, 0.4), respectively.  
 34 Following [8], we use only the local crops for self-distillation with global crops from the same image.  
 35 Additionally, we apply blockwise masking to the global crops inputted into the student network. The  
 36 masking ratio is uniformly sampled from [0, 1, 0.5] with a probability of 0.5, and with a probability  
 37 of 0.5, it is set to 0. Our batch size is 480, with a batch size per GPU of 120. DPViT is pre-trained for  
 38 500 epochs for the given training set for all the datasets.

39 We use the value of  $\lambda_{cls} = 1, \lambda_s = 0.5, \lambda_o = 0.5$  for all the datasets. In the case of ImageNet-9,  
 40 we incorporate the class labels by incorporating a logit head onto the projection heads. This allows  
 41 us to calculate the cross-entropy loss based on the provided class labels. The explicit utilization of  
 42 class labels is necessary for the ImageNet-9 dataset because the evaluation involves straightforward  
 43 classification rather than few-shot learning.

44 **Fine-tuning Details.** Once the pretraining stage is completed, we proceed to train the model using  
 45 the supervised contrastive loss, which involves distilling knowledge from [cls] tokens across different  
 46 views of images (referred to as  $\mathcal{L}_{cls}$  in Equation 9 of the main draft). The fine-tuning process is  
 47 conducted for 50 epochs using the same training data in the given dataset. We maintain the same set  
 48 of hyperparameters used in the initial pretraining stage without additional tuning.

49 We use the value of  $\lambda_{cls}^{inv} = 1$ , and  $\lambda_p^{inv} = 0.5$  for all the datasets.

50 **Inference Details.** For inference purposes, we utilized a feature representation obtained by the [cls]  
 51 token of the teacher network. We also found concatenating the weighted average pooling of the  
 52 generated patches with the [cls] token useful in a few-shot evaluation. The weights for the weighted  
 53 average pooling are determined by taking the average of the attention values of the [cls] token across  
 54 all heads of the final attention layer.

55 In the case of ImageNet-9, the logit head is used to infer the class label for the given sample in the  
 56 test set.

### 57 1.3 Details regarding the multi-head attention modules

58 The design of our attention layers draws inspiration from the standard self-attention mechanism,  
 59 commonly known as **qkv** self-attention (SA) [2]. In our implementation, we calculate a weighted sum  
 60 over all values  $\mathbf{v}$  in the input sequence  $\mathbf{z}$ , where  $\mathbf{z}$  has dimensions of  $\mathbb{R}^{N \times D}$ . The attention weights  
 61  $A_{ij}$  are determined based on the pairwise similarity between two elements of the sequence and their  
 62 corresponding query  $\mathbf{q}^i$  and key  $\mathbf{k}^j$  representations.

$$\mathbf{q}, \mathbf{k}, \mathbf{v} = \mathbf{z} \mathbf{U}_{qkv} \quad \mathbf{U}_{qkv} \in \mathbb{R}^{D \times 3D_h}, \quad (1)$$

$$A = \text{softmax} \left( \frac{\mathbf{qk}^T}{\sqrt{D_h}} \right) \quad A \in \mathbb{R}^{N \times N}, \quad (2)$$

$$SA(\mathbf{z}) = A \mathbf{v}. \quad (3)$$

63 Multihead self-attention (MSA) is an expansion of the self-attention mechanism, where we perform  
 64  $k$  parallel self-attention operations, known as "heads," and then combine their outputs through  
 65 concatenation. In order to maintain consistent computation and the number of parameters when  
 66 adjusting the value of  $k$ , the dimension  $D_h$  (as defined in Equation 1) is typically set to  $D/k$ .

$$MSA(\mathbf{z}) = [SA_1(\mathbf{z}); SA_2(\mathbf{z}); \dots; SA_k(\mathbf{z})] \mathbf{U}_{msa} \quad \mathbf{U}_{msa} \in \mathbb{R}^{k \cdot D_h \times D} \quad (4)$$

### 67 1.4 Details regarding the power iterative method to compute spectral norm

68 We follow the power iterative method described in [1] to compute the spectral norm for  $(\mathbf{P}^T \mathbf{P} - \mathbf{I})$ .  
 69 Starting with a randomly initialized  $v \in \mathbb{R}^n$ , we iteratively perform the following procedure a small  
 70 number of times (2 times by default) :

$$u \leftarrow (\mathbf{P}^T \mathbf{P} - \mathbf{I})v, v \leftarrow (\mathbf{P}^T \mathbf{P} - \mathbf{I})u, \sigma(\mathbf{P}^T \mathbf{P} - \mathbf{I}) \leftarrow \frac{\|v\|}{\|u\|}. \quad (5)$$

71 The power iterative method reduces computational cost from  $\mathcal{O}(n^3)$  to  $\mathcal{O}(mn^2)$ , which is practically  
 72 much faster when used with our training procedure.

| Method                 | IN-9L $\uparrow$ | Original $\uparrow$ | M-SAME $\uparrow$ | M-RAND $\uparrow$ | BG-GAP $\downarrow$ |
|------------------------|------------------|---------------------|-------------------|-------------------|---------------------|
| ResNet-50 [6]          | 94.6             | 96.3                | 89.9              | 75.6              | 14.3                |
| WRN-50 $\times$ 2 [6]  | 95.2             | 97.2                | 90.6              | 78.0              | 12.6                |
| ConstNet [7]           | 90.6             | 92.7                | 86.1              | 69.2              | 17.1                |
| ViT-S pretrained [2]   | 82.5             | 84.9                | 72.2              | 50.3              | 21.9                |
| ConceptTransformer [5] | 84.7             | 85.5                | 73.1              | 51.5              | 21.6                |
| <b>Ours - DPViT</b>    | <b>96.9</b>      | <b>98.5</b>         | <b>93.4</b>       | <b>87.5</b>       | <b>5.9</b>          |

Table 1: Performance evaluation on domain shift of varying background and common data corruptions on ImageNet-9. Evaluation metric is Accuracy %.

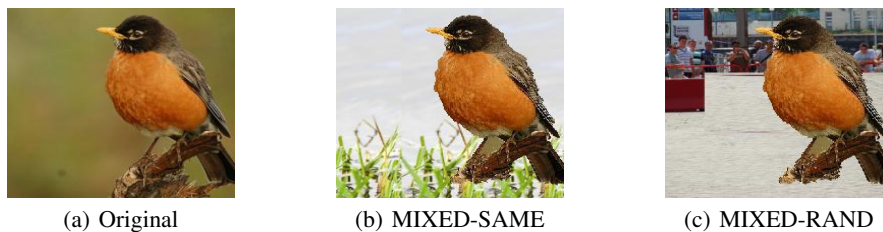

Figure 1: Visualizing the test splits from ImageNet-9 dataset.

### 73 1.5 Comparing ViT-S [2] and Concept Transformer (CT) [5] on ImageNet-9

74 In addition to the findings presented in Section 5.4 (Table 2 in the main draft), we conducted a  
75 comparison with vanilla ViT-S pretrained on Imagenet and ConceptTransformers (CT) as well. CT, as  
76 described in the study by [5], has a notable limitation in that it relies on attribute supervision for part  
77 localization information. This restriction restricts the applicability of CT in scenarios where attribute  
78 information is absent, such as in the case of ImageNet-9. To train CT without attributes, we utilized  
79 the code provided by the authors and deactivated the attribute loss, allowing CT to be trained without  
80 relying on the attribute information <sup>1</sup>. This adjustment significantly decreases the performance of CT  
81 but enables a fair comparison with other methods on ImageNet-9. It is worth noting that CT employs  
82 the ViT-S backbone pretrained on ImageNet as its default architecture. Moreover, we train ConstNet  
83 [7] using the source code provided by the authors <sup>2</sup>.

84 As indicated in Table 1, DPViT demonstrates superior performance compared to both ViT-S pretrained  
85 on ImageNet and CT, exhibiting a clear advantage. CT can be seen as a pretrained ViT-S model  
86 with the inclusion of part dictionaries, but it experiences a noticeable drop in performance when  
87 confronted with the presence of incidental correlations in the image backgrounds (as observed in the  
88 low M-SAME and M-RAND performance in Table 1). This demonstrates that the part learners in  
89 general cannot effectively deal with the incidental correlations of backgrounds and are susceptible to  
90 varying backgrounds.

### 91 1.6 Ablation study with different values of $K$ and $n_f$ on MiniImageNet

92 In this analysis, we investigate the impact of varying the number of parts, denoted as  $K$ , on the  
93 MiniImageNet dataset. Specifically, we explore the effects of altering the number of foreground parts,  
94 represented by  $n_f$ , as well as the number of background vectors, which can be calculated as  $K - n_f$ .  
95 Table 2 presents the obtained results, demonstrating the influence of different values of  $K$ ,  $n_f$ , and  
96  $n_b$  on parts, foreground parts, and background parts, respectively.

97 Our findings indicate that maintaining  $K = 64$  and selecting  $n_f = 2K/3$  yields the highest  
98 performance. When employing a significantly lower number of part vectors, the model’s capacity  
99 becomes insufficient, leading to performance degradation. Conversely, employing a larger value of  $K$   
100 results in increased computational complexity associated with distance maps, subsequently leading to  
101 lower performance.

<sup>1</sup>ConceptTransformer [5] - [https://github.com/IBM/concept\\_transformer](https://github.com/IBM/concept_transformer)

<sup>2</sup>ConstNet [7] - <https://github.com/mlpc-ucsd/ConstellationNet>

| Foreground parts | K=32           |                | K=64           |                | K=96           |                | K=128          |                |
|------------------|----------------|----------------|----------------|----------------|----------------|----------------|----------------|----------------|
|                  | 1-shot         | 5-shot         | 1-shot         | 5-shot         | 1-shot         | 5-shot         | 1-shot         | 5-shot         |
| $n_f = K/2$      | 72.2 $\pm$ 0.2 | 87.8 $\pm$ 0.4 | 72.9 $\pm$ 0.5 | 88.1 $\pm$ 0.4 | 72.1 $\pm$ 0.2 | 88.1 $\pm$ 0.4 | 72.1 $\pm$ 0.5 | 87.1 $\pm$ 0.5 |
| $n_f = 2K/3$     | 72.2 $\pm$ 0.2 | 88.1 $\pm$ 0.4 | 73.8 $\pm$ 0.5 | 89.3 $\pm$ 0.4 | 73.1 $\pm$ 0.2 | 88.1 $\pm$ 0.4 | 72.2 $\pm$ 0.5 | 87.4 $\pm$ 0.5 |
| $n_f = 4K/3$     | 72.3 $\pm$ 0.2 | 88.4 $\pm$ 0.4 | 73.4 $\pm$ 0.5 | 88.5 $\pm$ 0.4 | 73.2 $\pm$ 0.2 | 87.9 $\pm$ 0.4 | 72.5 $\pm$ 0.5 | 87.8 $\pm$ 0.5 |

Table 2: Ablation of varying the number of foreground-background vectors, along with part-vectors used. We show the results on the miniImageNet dataset.

| Setting  | 1-shot $\uparrow$ | 5-shot $\uparrow$ | $\ P\ _1 \downarrow$ | $\ PP^T - I\ _1 \downarrow$ |
|----------|-------------------|-------------------|----------------------|-----------------------------|
| Shared   | 73.6              | 89.6              | 0.4                  | 0.5                         |
| Unshared | 73.8              | 89.8              | 0.3                  | 0.5                         |

Table 3: **Siamese DPViT**. Sharing MSA and MCA layers and evaluation on MiniImageNet.

| Method   | 1-shot $\uparrow$ | 5-shot $\uparrow$ |
|----------|-------------------|-------------------|
| SMKD [4] | 60.93             | 80.38             |
| DPViT    | 62.81             | 83.25             |

Table 4: Few-shot performance after 1<sup>st</sup> stage pretrain phase on MiniImageNet.

## 1.7 Computational complexity of DPViT

Adding part-dictionaries to MCA layers slightly increases the trainable parameters from 21M (ViT-S) to 25M (DPViT). It is also possible to share the attention layers, analogous to the Siamese networks, for MSA and MCA, which keeps the number of trainable parameters to 21M. DPViT results in a similar performance in terms of few-shot accuracy when the attention layers are shared, as shown in Table 3.

## 1.8 Stage-1 pertaining comparison with SMKD [4]

Table 4 showcases the few-shot evaluation results of DPViT on the MiniImageNet dataset. In addition, we compare the performance of DPViT with the first-stage performance of SMKD [4]. It is worth noting that both DPViT and SMKD utilize the iBOT [8] pretraining strategy. However, incorporating part-dictionaries, MSA, and MCA layers in DPViT’s pretraining phase contributes to its superior performance compared to SMKD.

## 1.9 Studying complementary properties of MSA and MCA

Based on Section 5.1 in the main draft, our study focuses on examining the complementary characteristics of MSA and MCA. MSA is designed to be effective for images containing a small number of objects, but it struggles to capture the spatial relationships among multiple objects. In contrast, MCA layers utilize distance maps to learn spatial relationships and prioritize objects without considering their specific classes. In simpler terms, MSA may overlook certain objects that are not crucial for classification, while MCA emphasizes learning spatially similar objects.

Additionally, we present the visualization of attention heads in Figure 2, 3, and 5. The MSA heads excel at identifying objects for classification but may overlook relevant objects with significant spatial context, such as the "charger" in Figure 2 and the "garbage box" in Figure 5. On the other hand, the MCA layers perform well in scenarios involving multiple objects (Figure 2 and 5), but struggle when spatially similar objects are present, as seen with the confusion between the "red grass" and the "fish" in Figure 3.

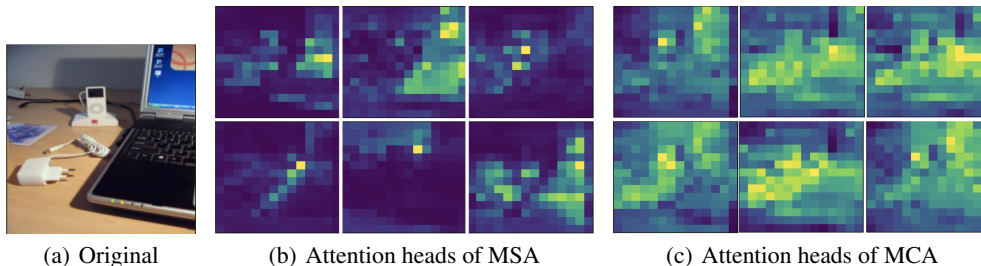

Figure 2: Visualizing the attention heads for MSA and MCA.

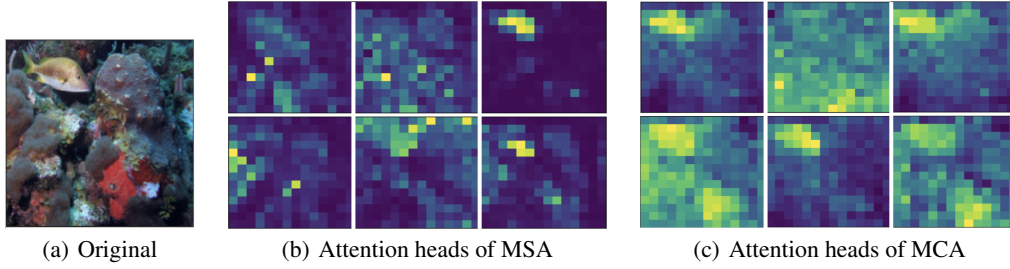

Figure 3: Visualizing the attention heads for MSA and MCA.

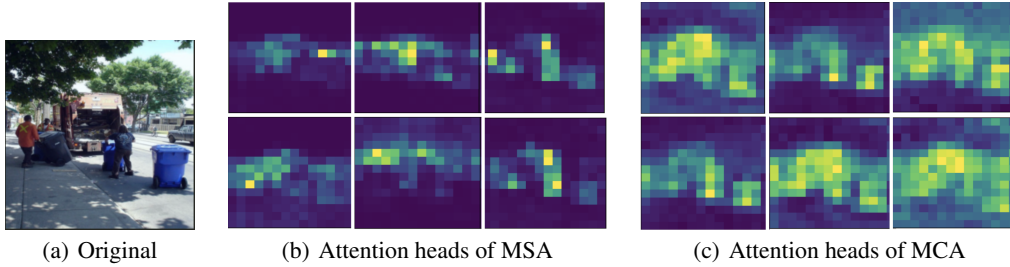

Figure 4: Visualizing the attention heads for MSA and MCA.

127 **1.10 Visualization foreground parts**

128 We present additional part visualizations for Figure 3(a) and 4(a). These are shown in Figure 5(a) and  
 129 5(b).

130 **1.11 Qualitative comparison of extracted patches with ConstNet [7]**

131 In order to showcase the acquired parts of DPViT and ConstNet, we provide visualizations in Figure 6  
 132 and 7. This is achieved by selecting the nearest patches to the parts. Figure 6 illustrates the separation

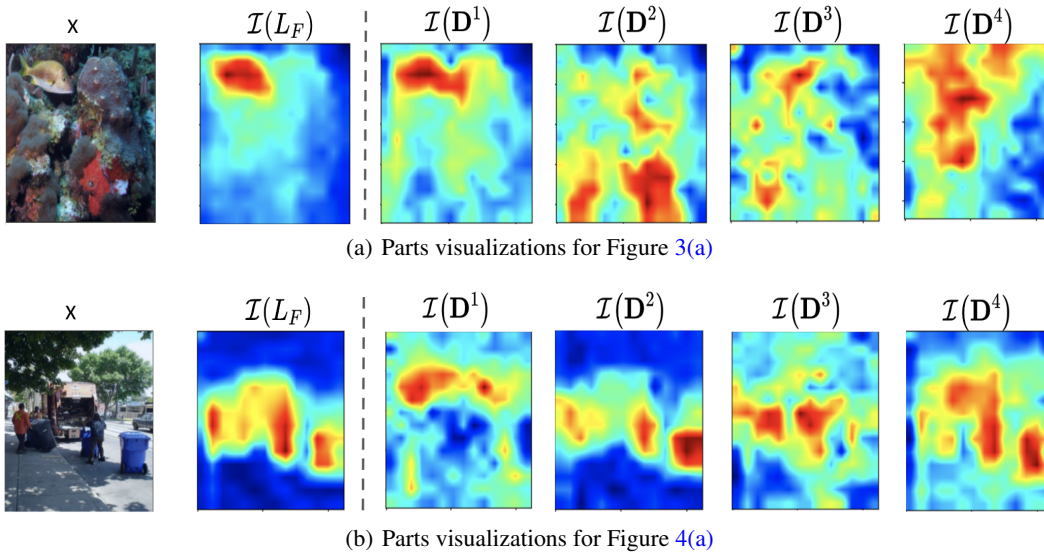

Figure 5: Visualizing foreground parts learned by DPViT.

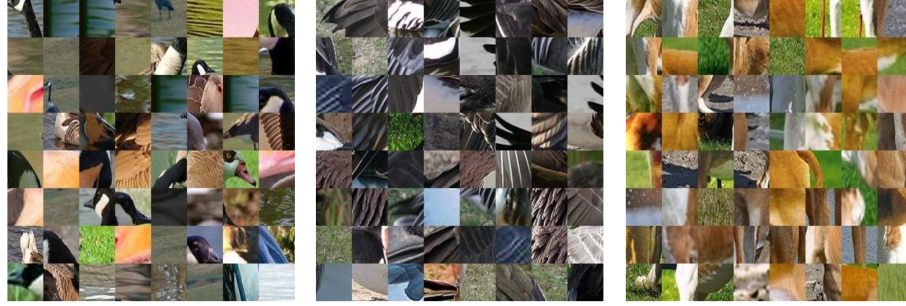

(a) Foreground patches extracted by DPViT

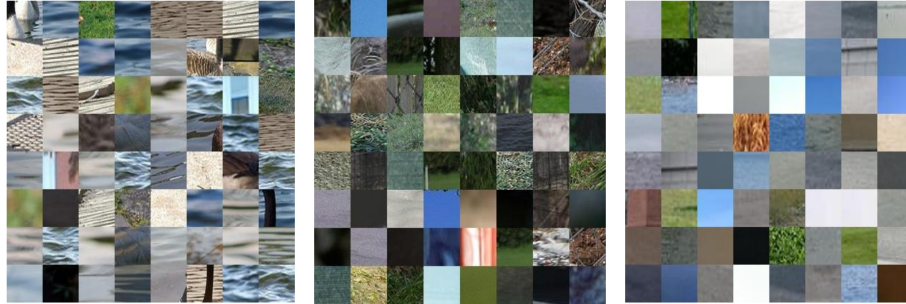

(b) Background patches extracted by DPViT

Figure 6: Visualizing foreground and background patches extracted by DPViT around a random foreground and background part for images from the validation set of MiniImageNet.

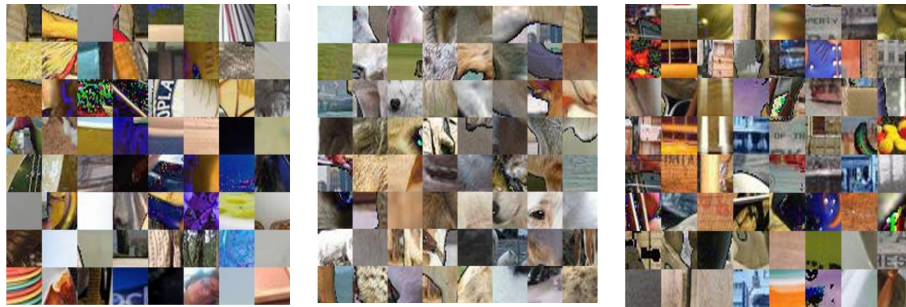

(a) Patches extracted by ConstNet [7]

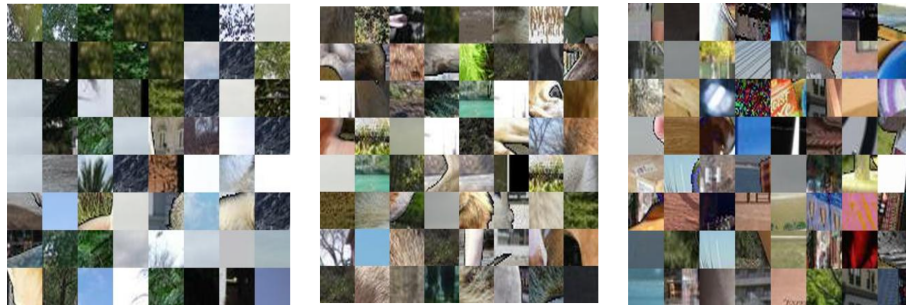

(b) Patches extracted by ConstNet [7]

Figure 7: Visualizing patches extracted by ConstNet [7] around a random parts for images from the validation set of MiniImageNet.

133 of foreground and background concepts accomplished by our model, whereas Figure 7 exhibits the  
 134 patches surrounding the learned parts from the ConstNet model.

135 While DPViT learns to disentangle the foreground patches from the backgrounds, the patches extracted  
136 by ConstNet suffer from the entanglement caused due to incidental correlations of backgrounds.

## 137 **References**

- 138 [1] Nitin Bansal, Xiaohan Chen, and Zhangyang Wang. Can we gain more from orthogonality  
139 regularizations in training deep networks? *Advances in Neural Information Processing Systems*,  
140 31, 2018.
- 141 [2] Alexey Dosovitskiy, Lucas Beyer, Alexander Kolesnikov, Dirk Weissenborn, Xiaohua Zhai,  
142 Thomas Unterthiner, Mostafa Dehghani, Matthias Minderer, Georg Heigold, Sylvain Gelly,  
143 Jakob Uszkoreit, and Neil Houlsby. An image is worth 16x16 words: Transformers for image  
144 recognition at scale. *International Conference on Learning Representations (ICLR)*, 2021.
- 145 [3] Jianqing Fan, Fang Han, and Han Liu. Challenges of big data analysis. *National science review*,  
146 1(2):293–314, 2014.
- 147 [4] Han Lin, Guangxing Han, Jiawei Ma, Shiyuan Huang, Xudong Lin, and Shih-Fu Chang. Super-  
148 vised masked knowledge distillation for few-shot transformers. *arXiv preprint arXiv:2303.15466*,  
149 2023.
- 150 [5] Mattia Rigotti, Christoph Miksovic, Ioana Giurgiu, Thomas Gschwind, and Paolo Scotton.  
151 Attention-based interpretability with concept transformers. In *International Conference on*  
152 *Learning Representations (ICLR)*, 2022.
- 153 [6] Kai Xiao, Logan Engstrom, Andrew Ilyas, and Aleksander Madry. Noise or signal: The role of  
154 image backgrounds in object recognition. *International Conference on Learning Representations*  
155 *(ICLR)*, 2020.
- 156 [7] Weijian Xu, Yifan xu, Huaijin Wang, and Zhuowen Tu. Attentional constellation nets for few-shot  
157 learning. In *International Conference on Learning Representations*, 2021.
- 158 [8] Jinghao Zhou, Chen Wei, Huiyu Wang, Wei Shen, Cihang Xie, Alan Yuille, and Tao Kong. Image  
159 bert pre-training with online tokenizer. In *International Conference on Learning Representations*,  
160 2022.
